# Supplementary material
Source: publisher site journal article supplement (https://www.dovepress.com/article/326638)
Supplement: Supplementary file 1 [file get_supplementary_file.php]

**Appendix 1**

**Embase.com**

('complex regional pain syndrome'/exp/mj OR ((complex NEAR/3 regional NEAR/3 pain) OR crps OR (reflex NEAR/3 sympathetic NEAR/3 dystroph*)):ti) AND ('reliability'/de OR validity/exp OR 'conflict'/de OR 'health personnel attitude'/de OR 'diagnostic accuracy'/de OR 'public opinion'/de OR uncertainty/de OR editorial/de OR 'evidence based practice'/exp OR (reliab* OR unreliab* OR reproducib* OR controvers* OR debate OR objectivit* OR ambigu* OR inappropriat* OR validit* OR view OR views OR confus* OR conflict* OR conflict* OR dispute* OR argument* OR ((personnel* OR doctor* OR physician*) NEAR/3 attitude*) OR (diagnos* NEAR/3 accura*) OR unclear* OR opinion* OR uncertain* OR editorial* OR myth* OR Factitious OR evidence-based OR (systematic* NEAR/3 review*) OR (exist* NEAR/3 (does OR 'not'))):ab,ti OR response:ti) AND [english]/lim

**Medline Ovid**

(* complex regional pain syndromes/ OR ((complex ADJ3 regional ADJ3 pain) OR crps OR (reflex ADJ3 sympathetic ADJ3 dystroph*)).ti.) AND (Reproducibility of Results/ or Validation Studies as Topic/ OR "Conflict (Psychology)"/ OR Attitude of Health Personnel/ OR Public Opinion/ OR Uncertainty/ OR editorial.pt. OR Evidence-Based Practice/ OR (reliab* OR unreliab* OR reproducib* OR controvers* OR debate OR objectivit* OR ambigu* OR inappropriat* OR validit* OR view OR views OR confus* OR conflict* OR conflict* OR dispute* OR argument* OR ((personnel* OR doctor* OR physician*) ADJ3 attitude*) OR (diagnos* ADJ3 accura*) OR unclear* OR opinion* OR uncertain* OR editorial* OR myth* OR Factitious OR evidence-based OR (systematic* ADJ3 review*) OR (exist* ADJ3 (does OR "not"))).ab,ti. OR response.ti.) AND english.la.

**Cochrane CENTRAL**

(((complex NEAR/3 regional NEAR/3 pain) OR crps OR (reflex NEAR/3 sympathetic NEAR/3 dystroph*)):ti) AND ((reliab* OR unreliab* OR reproducib* OR controvers* OR debate OR objectivit* OR ambigu* OR inappropriat* OR validit* OR view OR views OR confus* OR conflict* OR conflict* OR dispute* OR argument* OR ((personnel* OR doctor* OR physician*) NEAR/3 attitude*) OR (diagnos* NEAR/3 accura*) OR unclear* OR opinion* OR uncertain* OR editorial* OR myth* OR Factitious OR evidence-based OR (systematic* NEAR/3 review*) OR (exist* NEAR/3 (does OR 'not'))):ab,ti OR response:ti)
